# Supplementary material for: Inequalities in Health Care Experience of Patients with Chronic Conditions: Results from a Population-Based Study
Source: MDPI journal article supplement (doi:10.3390/healthcare9081005), 2021-08-05
Supplement: s1 [file s1]

**Table S3.** Model 3—WLS results (detailed). Differences in healthcare experience among patients with self-declared chronic conditions. The effect of chronic conditions.

| Variable                           | Category               | Factor 1:<br>INTER<br>Coef.<br>95% C.I. | Factor 2:<br>NEW<br>Coef.<br>95% C.I. | Factor 3:<br>SELF<br>Coef.<br>95% C.I. | OVERALL<br>IEXPAC<br>Coef.<br>95% C.I. |
|------------------------------------|------------------------|-----------------------------------------|---------------------------------------|----------------------------------------|----------------------------------------|
| Gender                             | Men                    | 0.075<br>-0.104,0.253                   | 0.013<br>-0.127,0.152                 | 0.059<br>-0.115,0.232                  | 0.052<br>-0.087,0.191                  |
| Age ranges. Baseline:<br>15-24     | 25-44                  | -1.220<br>-2.908,0.467                  | -0.888<br>-3.221,1.445                | -0.942<br>-2.998,1.115                 | -1.028<br>-2.787,0.731                 |
|                                    | 45-64                  | -0.705<br>-1.995,0.585                  | -1.063<br>-3.210,1.084                | -0.163<br>-2.017,1.690                 | -0.606<br>-2.171,0.959                 |
|                                    | 65-74                  | -0.787<br>-2.106,0.532                  | -1.469<br>-3.611,0.673                | -0.423<br>-2.286,1.441                 | -0.841<br>-2.416,0.735                 |
|                                    | 75-89                  | -0.164<br>-1.426,1.097                  | -1.644<br>-3.773,0.486                | 0.357<br>-1.486,2.200                  | -0.378<br>-1.924,1.168                 |
|                                    | >=90                   | -1.160<br>-3.631,1.311                  | -2.141*<br>-4.440,0.159               | -1.251<br>-4.258,1.756                 | -1.460<br>-3.749,0.828                 |
| Occupation<br>Baseline: Managers I | Managers II            | -0.136<br>-1.063,0.791                  | -2.470***<br>-3.605,-1.334            | -0.537<br>-1.676,0.603                 | -0.918**<br>-1.808,-0.028              |
|                                    | Intermediate           | -0.520<br>-2.167,1.128                  | -0.171<br>-1.280,0.937                | 1.725**<br>0.085,3.365                 | 0.392<br>-0.946,1.729                  |
|                                    | Semi-qualified         | 0.739<br>-0.342,1.821                   | 1.324*<br>-0.218,2.867                | 1.011<br>-0.398,2.419                  | 0.998*<br>-0.111,2.106                 |
|                                    | Non-qualified          | 0.174<br>-0.767,1.115                   | -0.779<br>-2.003,0.446                | 0.424<br>-0.754,1.603                  | 0.005<br>-0.922,0.933                  |
|                                    |                        | -1.774**<br>-3.128,-0.419               | -1.849*<br>-3.730,0.031               | -2.169**<br>-3.797,-0.541              | -1.938**<br>-3.329,-0.546              |
| Education. Baseline:<br>Primary    | Secondary-lower        | -0.871<br>-1.945,0.202                  | -0.180<br>-2.013,1.653                | -0.525<br>-1.990,0.940                 | -0.557<br>-1.819,0.705                 |
|                                    | Secondary-upper        | -0.126<br>-1.374,1.122                  | -0.270<br>-2.541,2.000                | -0.240<br>-2.074,1.594                 | -0.207<br>-1.707,1.293                 |
|                                    | Tertiary               |                                         |                                       |                                        |                                        |
| Occupation#Age                     | Managers II # 25-44    | 0.621<br>-0.683,1.925                   | 3.508***<br>1.920,5.097               | 1.418*<br>-0.023,2.859                 | 1.698**<br>0.510,2.886                 |
|                                    | Managers II # 45-64    | -0.278<br>-1.399,0.842                  | 2.573***<br>1.320,3.827               | 0.180<br>-1.116,1.476                  | 0.666<br>-0.356,1.688                  |
|                                    | Managers II # 65-74    | -0.392<br>-1.645,0.860                  | 2.923***<br>1.591,4.256               | 0.422<br>-0.981,1.826                  | 0.808<br>-0.312,1.928                  |
|                                    | Managers II # 75-89    | 0.228<br>-0.976,1.432                   | 2.663***<br>1.302,4.024               | 0.707<br>-0.710,2.125                  | 1.066*<br>-0.015,2.148                 |
|                                    | Managers II # >=90     | 2.089<br>-0.542,4.719                   | 2.145**<br>0.485,3.804                | 2.507<br>-0.560,5.573                  | 2.256**<br>0.226,4.286                 |
|                                    | Intermediate # 25-44   | -0.083<br>-2.142,1.976                  | 0.877<br>-0.830,2.583                 | -1.881*<br>-4.113,0.352                | -0.475<br>-2.241,1.291                 |
|                                    | Intermediate # 45-64   | -0.460<br>-2.305,1.385                  | 0.081<br>-1.156,1.318                 | -2.322**<br>-4.117,-0.528              | -0.990<br>-2.461,0.482                 |
|                                    | Intermediate # 65-74   | 0.126<br>-1.796,2.048                   | 0.154<br>-1.100,1.408                 | -2.025**<br>-3.905,-0.146              | -0.649<br>-2.180,0.882                 |
|                                    | Intermediate # 75-89   | -0.066<br>-1.864,1.731                  | -0.009<br>-1.297,1.280                | -2.452**<br>-4.275,-0.628              | -0.918<br>-2.380,0.544                 |
|                                    | Intermediate # >=90    | 2.687**<br>0.001,5.372                  | -0.190<br>-1.814,1.434                | 1.158<br>-1.959,4.276                  | 1.346<br>-0.900,3.593                  |
|                                    | Semi-qualified # 25-44 | -0.748<br>-2.097,0.600                  | -0.923<br>-2.597,0.751                | -1.143<br>-2.749,0.463                 | -0.939<br>-2.210,0.331                 |
|                                    | Semi-qualified # 45-64 | -0.687<br>-1.871,0.497                  | -1.368*<br>-2.961,0.225               | -0.939<br>-2.423,0.546                 | -0.964<br>-2.133,0.205                 |
|                                    | Semi-qualified # 65-74 | -0.836<br>-2.075,0.402                  | -1.278<br>-2.887,0.331                | -0.688<br>-2.204,0.829                 | -0.903<br>-2.106,0.300                 |
|                                    | Semi-qualified # 75-89 | -1.199*<br>-2.417,0.020                 | -1.580*<br>-3.177,0.017               | -1.565**<br>-3.094,-0.035              | -1.436**<br>-2.628,-0.243              |
|                                    | Semi-qualified # >=90  | -0.347<br>-3.068,2.375                  | -1.481<br>-3.378,0.417                | -0.104<br>-3.094,2.887                 | -0.567<br>-2.792,1.657                 |
|                                    | Non-qualified # 25-44  | -0.249<br>-1.479,0.981                  | 0.850<br>-0.491,2.192                 | -0.202<br>-1.585,1.180                 | 0.068<br>-1.031,1.166                  |
|                                    | Non-qualified # 45-64  | -0.458<br>-1.508,0.593                  | 0.663<br>-0.616,1.942                 | -0.706<br>-1.966,0.554                 | -0.242<br>-1.236,0.752                 |
|                                    | Non-qualified # 65-74  | -0.166                                  | 0.557                                 | -0.271                                 | -0.007                                 |

|                    |                         |              |                |               |               |
|--------------------|-------------------------|--------------|----------------|---------------|---------------|
|                    |                         | -1.270,0.937 | -0.734,1.849   | -1.562,1.020  | -1.032,1.018  |
|                    | Non-qualified # 75-89   | -0.436       | 0.663          | -0.883        | -0.299        |
|                    |                         | -1.498,0.626 | -0.621,1.947   | -2.169,0.403  | -1.301,0.703  |
|                    | Non-qualified # >=90    | 0.981        | 1.444*         | 1.258         | 1.208         |
|                    |                         | -1.387,3.350 | -0.130,3.019   | -1.401,3.918  | -0.738,3.154  |
| Education#Age      | Secondary-lower # 25-44 | 1.931**      | 0.991          | 2.130**       | 1.747**       |
|                    |                         | 0.138,3.725  | -1.185,3.168   | 0.185,4.075   | 0.067,3.428   |
|                    | Secondary-lower # 45-64 | 1.474**      | 1.187          | 1.884**       | 1.545**       |
|                    |                         | 0.048,2.901  | -0.726,3.101   | 0.202,3.566   | 0.110,2.980   |
|                    | Secondary-lower # 65-74 | 1.868**      | 1.464          | 2.257**       | 1.899**       |
|                    |                         | 0.449,3.286  | -0.436,3.365   | 0.582,3.932   | 0.472,3.327   |
|                    | Secondary-lower # 75-89 | 1.868**      | 1.456          | 2.110**       | 1.844**       |
|                    |                         | 0.469,3.268  | -0.435,3.347   | 0.442,3.777   | 0.428,3.259   |
|                    | Secondary-lower # >=90  | 1.658*       | 1.728*         | 2.078**       | 1.830**       |
|                    |                         | -0.079,3.395 | -0.320,3.776   | 0.164,3.992   | 0.222,3.437   |
|                    | Secondary-upper # 25-44 | 0.961        | -0.504         | 0.440         | 0.372         |
|                    |                         | -0.526,2.448 | -2.561,1.554   | -1.258,2.137  | -1.114,1.858  |
|                    | Secondary-upper # 45-64 | 0.714        | 0.102          | 0.330         | 0.407         |
|                    |                         | -0.431,1.858 | -1.764,1.968   | -1.184,1.844  | -0.895,1.710  |
|                    | Secondary-upper # 65-74 | 0.974        | -0.004         | 0.606         | 0.573         |
|                    |                         | -0.190,2.138 | -1.861,1.853   | -0.917,2.128  | -0.733,1.880  |
|                    | Secondary-upper # 75-89 | 1.112*       | 0.075          | 0.660         | 0.665         |
|                    |                         | -0.052,2.276 | -1.796,1.947   | -0.886,2.206  | -0.650,1.980  |
|                    | Secondary-upper # >=90  | 1.614        | -0.029         | 1.858         | 1.255         |
|                    |                         | -0.321,3.549 | -1.980,1.922   | -0.410,4.126  | -0.454,2.963  |
|                    | Tertiary # 25-44        | 0.233        | 0.093          | 0.218         | 0.189         |
|                    |                         | -1.440,1.905 | -2.376,2.562   | -1.846,2.282  | -1.531,1.910  |
|                    | Tertiary # 45-64        | -0.247       | 0.084          | -0.418        | -0.219        |
|                    |                         | -1.602,1.108 | -2.229,2.397   | -2.324,1.488  | -1.777,1.339  |
|                    | Tertiary # 65-74        | 0.092        | 0.399          | -0.066        | 0.118         |
|                    |                         | -1.358,1.542 | -1.930,2.728   | -2.038,1.906  | -1.491,1.727  |
|                    | Tertiary # 75-89        | -0.091       | 0.334          | -0.171        | -0.004        |
|                    |                         | -1.508,1.325 | -2.017,2.685   | -2.143,1.802  | -1.602,1.593  |
|                    | Tertiary # >=90         | -2.523       | -0.520         | -1.659        | -1.663        |
|                    |                         | -7.555,2.508 | -2.954,1.914   | -6.134,2.817  | -5.281,1.956  |
| Chronic conditions | Hypertension            | 0.109        | -0.027         | 0.160*        | 0.090         |
|                    |                         | -0.069,0.287 | -0.163,0.110   | -0.012,0.332  | -0.048,0.229  |
|                    | Cholesterol (high)      | 0.144        | -0.102         | 0.123         | 0.069         |
|                    |                         | -0.033,0.320 | -0.238,0.034   | -0.050,0.295  | -0.068,0.206  |
|                    | Osteoarthritis          | -0.119       | -0.158*        | -0.007        | -0.089        |
|                    |                         | -0.354,0.117 | -0.317,0.000   | -0.234,0.220  | -0.265,0.088  |
|                    | Lower-back pain         | -0.094       | -0.269**       | -0.184        | -0.174*       |
|                    |                         | -0.332,0.144 | -0.448, -0.091 | -0.422,0.054  | -0.357,0.008  |
|                    | Diabetes                | 0.485***     | 0.120          | 0.521***      | 0.398***      |
|                    |                         | 0.276,0.694  | -0.062,0.301   | 0.313,0.728   | 0.233,0.564   |
|                    | Other cardiovascular    | 0.021        | 0.063          | 0.107         | 0.064         |
|                    |                         | -0.237,0.279 | -0.126,0.251   | -0.156,0.370  | -0.140,0.268  |
|                    | Neck pain               | 0.015        | -0.169*        | -0.240*       | -0.128        |
|                    |                         | -0.260,0.289 | -0.368,0.030   | -0.510,0.031  | -0.332,0.076  |
|                    | Thyroids                | -0.009       | -0.009         | 0.060         | 0.016         |
|                    |                         | -0.307,0.289 | -0.225,0.206   | -0.212,0.332  | -0.209,0.241  |
|                    | Insomnia                | -0.079       | -0.078         | -0.095        | -0.085        |
|                    |                         | -0.407,0.248 | -0.275,0.119   | -0.394,0.204  | -0.326,0.157  |
|                    | Allergy                 | -0.146       | -0.245**       | -0.113        | -0.161        |
|                    |                         | -0.462,0.170 | -0.475, -0.016 | -0.420,0.194  | -0.403,0.081  |
|                    | Asthma                  | 0.216        | 0.230          | 0.232         | 0.226*        |
|                    |                         | -0.101,0.534 | -0.046,0.507   | -0.074,0.538  | -0.030,0.482  |
|                    | Deafness                | 0.155        | -0.151         | 0.132         | 0.063         |
|                    |                         | -0.133,0.444 | -0.366,0.064   | -0.159,0.422  | -0.156,0.282  |
|                    | Osteoporosis            | -0.175       | -0.039         | -0.144        | -0.127        |
|                    |                         | -0.510,0.161 | -0.267,0.189   | -0.472,0.184  | -0.387,0.134  |
|                    | Cardiovascular          | 0.203        | -0.129         | -0.112        | -0.002        |
|                    |                         | -0.106,0.513 | -0.363,0.104   | -0.413,0.190  | -0.231,0.227  |
|                    | Varicose veins (legs)   | 0.198        | -0.259**       | 0.113         | 0.042         |
|                    |                         | -0.100,0.496 | -0.458,-0.060  | -0.176,0.402  | -0.173,0.258  |
|                    | Other                   | -0.030       | 0.024          | 0.093         | 0.030         |
|                    |                         | -0.387,0.328 | -0.266,0.315   | -0.243,0.430  | -0.241,0.301  |
|                    | Skin conditions         | -0.306       | -0.287**       | -0.351**      | -0.317**      |
|                    |                         | -0.684,0.071 | -0.513,-0.060  | -0.700,-0.003 | -0.591,-0.044 |
|                    | Depression              | 0.036        | 0.057          | 0.188         | 0.097         |

|                                      |                         |                |              |                |                |
|--------------------------------------|-------------------------|----------------|--------------|----------------|----------------|
|                                      |                         | -0.363,0.436   | -0.264,0.378 | -0.218,0.595   | -0.228,0.422   |
|                                      | Anxiety                 | -0.289         | 0.228        | -0.017         | -0.049         |
|                                      |                         | -0.705,0.127   | -0.087,0.542 | -0.428,0.395   | -0.376,0.278   |
|                                      | Migraine                | -0.043         | -0.110       | -0.101         | -0.082         |
|                                      |                         | -0.422,0.337   | -0.365,0.145 | -0.466,0.263   | -0.365,0.201   |
|                                      | Other mouth             | -0.528**       | 0.036        | -0.158         | -0.239         |
|                                      |                         | -0.906, -0.149 | -0.296,0.369 | -0.525,0.210   | -0.533,0.054   |
|                                      | Caries                  | 0.075          | -0.163       | -0.165         | -0.077         |
|                                      |                         | -0.308,0.458   | -0.437,0.110 | -0.534,0.203   | -0.361,0.207   |
|                                      | Peptic Ulcer conditions | -0.441*        | 0.179        | -0.297         | -0.220         |
|                                      |                         | -0.898,0.017   | -0.148,0.505 | -0.729,0.135   | -0.566,0.127   |
|                                      | Prostate                | 0.311*         | -0.280*      | 0.146          | 0.090          |
|                                      |                         | -0.015,0.638   | -0.579,0.019 | -0.233,0.526   | -0.187,0.367   |
|                                      | Hemorrhoids             | -0.141         | 0.033        | 0.099          | -0.006         |
|                                      |                         | -0.525,0.244   | -0.278,0.345 | -0.296,0.495   | -0.306,0.295   |
|                                      | Cancer                  | 0.254          | 0.742***     | 0.504**        | 0.478**        |
|                                      |                         | -0.201,0.709   | 0.301,1.183  | 0.029,0.980    | 0.084,0.872    |
|                                      | Cataracts               | 0.053          | -0.031       | 0.009          | 0.014          |
|                                      |                         | -0.354,0.459   | -0.321,0.260 | -0.402,0.421   | -0.283,0.311   |
|                                      | COPD                    | 0.060          | 0.034        | 0.206          | 0.106          |
|                                      |                         | -0.479,0.598   | -0.354,0.421 | -0.274,0.687   | -0.306,0.518   |
|                                      | Incontinence            | -0.200         | -0.024       | -0.247         | -0.169         |
|                                      |                         | -0.696,0.295   | -0.432,0.384 | -0.731,0.237   | -0.547,0.209   |
|                                      | Kidney conditions       | -0.310         | 0.162        | -0.056         | -0.089         |
|                                      |                         | -0.853,0.233   | -0.204,0.528 | -0.559,0.446   | -0.494,0.317   |
|                                      | Blindness               | -0.208         | -0.043       | -0.070         | -0.113         |
|                                      |                         | -0.720,0.303   | -0.416,0.330 | -0.552,0.412   | -0.500,0.274   |
|                                      | Dementia                | 0.017          | 0.322        | -0.066         | 0.070          |
|                                      |                         | -0.549,0.583   | -0.086,0.731 | -0.684,0.552   | -0.399,0.539   |
|                                      | Constipation            | -0.325         | -0.144       | -0.609**       | -0.379**       |
|                                      |                         | -0.792,0.143   | -0.417,0.130 | -1.058, -0.160 | -0.710, -0.048 |
|                                      | Anemia                  | 0.556**        | 0.212        | 0.523**        | 0.450**        |
|                                      |                         | 0.133,0.980    | -0.190,0.613 | 0.067,0.979    | 0.107,0.793    |
|                                      | Thrombosis              | 0.292          | -0.036       | 0.649**        | 0.333          |
|                                      |                         | -0.263,0.848   | -0.389,0.318 | 0.116,1.182    | -0.078,0.743   |
|                                      | Other mental            | 0.550**        | 0.548*       | 0.773**        | 0.631**        |
|                                      |                         | 0.073,1.027    | -0.049,1.145 | 0.207,1.340    | 0.172,1.089    |
|                                      | Fibromyalgia            | 0.154          | 0.878**      | 0.612**        | 0.518**        |
|                                      |                         | -0.507,0.815   | 0.301,1.455  | 0.047,1.176    | 0.011,1.025    |
|                                      | AMI                     | 0.118          | 0.221        | 0.094          | 0.137          |
|                                      |                         | -0.455,0.691   | -0.291,0.734 | -0.508,0.695   | -0.329,0.604   |
|                                      | Diabetic foot           | -0.180         | 0.780        | 0.391          | 0.289          |
|                                      |                         | -1.263,0.903   | -0.411,1.971 | -1.165,1.946   | -0.860,1.439   |
| Constant term                        |                         | 8.266***       | 2.882**      | 6.741***       | 6.243***       |
|                                      |                         | 7.093,9.438    | 0.782,4.983  | 4.960,8.523    | 4.735,7.751    |
| Goodness-of-fit                      | R-squared               | 0.051          | 0.082        | 0.061          | 0.049          |
|                                      | BIC                     | 18,697.108     | 16,711.820   | 18,455.281     | 16,755.162     |
| Heteroscedasticity correction method | YES                     | Robust         | Robust       | Robust         | Robust         |
|                                      |                         | variance       | variance     | variance       | variance       |
| Sample size (¥)                      | N                       | 3,883          | 3,883        | 3,883          | 3,883          |

\*  $p < 0.1$ , \*\*  $p < 0.05$ , \*\*\*  $p < 0.001$ ; Coef.: Regression coefficient; COPD: chronic obstructive pulmonary disease; AMI: acute myocardial infarction. BIC: Bayesian information criterion; the presented model is corrected from heteroscedasticity using Eicker–Huber–White standard errors. ¥: Missing responses excluded for the analyses.
