# Supplementary material for: Inequalities in Health Care Experience of Patients with Chronic Conditions: Results from a Population-Based Study
Source: MDPI journal article supplement (doi:10.3390/healthcare9081005), 2021-08-05
Supplement: s1 [file s1]

**Table S4.** Model 4—WLS results (detailed). Differences in healthcare experience among patients with self-declared chronic conditions. The effect of self-reported Quality of life.

| Independent variables              | Category               | Factor 1:<br>INTER<br>Coef.<br>95% CI | Factor 2:<br>NEW<br>Coef.<br>95% CI | Factor 3:<br>SELF<br>Coef.<br>95% CI | OVERALL<br>IEXPAC<br>Coef.<br>95% CI |
|------------------------------------|------------------------|---------------------------------------|-------------------------------------|--------------------------------------|--------------------------------------|
| Gender                             | Men                    | 0.141*<br>-0.019,0.300                | 0.012<br>-0.117,0.141               | 0.178**<br>0.014,0.342               | 0.119*<br>-0.009,0.248               |
| Age ranges. Baseline:<br>15-24     | 25-44                  | -1.022<br>-2.936,0.893                | -1.000<br>-3.202,1.203              | -1.297<br>-2.871,0.278               | -1.116<br>-2.729,0.498               |
|                                    | 45-64                  | -0.225<br>-1.921,1.472                | -1.233<br>-3.239,0.772              | -0.756<br>-1.920,0.408               | -0.693<br>-2.100,0.714               |
|                                    | 65-74                  | -0.311<br>-2.011,1.389                | -1.649<br>-3.648,0.351              | -0.680<br>-1.868,0.508               | -0.810<br>-2.222,0.602               |
|                                    | 75-89                  | 0.494<br>-1.194,2.182                 | -1.812*<br>-3.800,0.176             | 0.022<br>-1.116,1.160                | -0.306<br>-1.695,1.082               |
|                                    | >=90                   | -0.988<br>-3.838,1.862                | -2.386**<br>-4.457,-0.315           | -0.861<br>-3.184,1.462               | -1.323<br>-3.419,0.773               |
| Occupation<br>Baseline: Managers I | Managers II            | -0.700<br>-1.787,0.386                | -2.634***<br>-3.734,-1.534          | -0.365<br>-1.241,0.511               | -1.106**<br>-1.953,-0.259            |
|                                    | Intermediate           | 1.570**<br>0.159,2.980                | -0.166<br>-1.226,0.895              | -0.649<br>-2.123,0.825               | 0.290<br>-0.883,1.463                |
|                                    | Semi-qualified         | 0.999<br>-0.334,2.331                 | 1.461*<br>-0.042,2.964              | 0.647<br>-0.384,1.679                | 0.997<br>-0.059,2.053                |
|                                    | Non-qualified          | 0.399<br>-0.742,1.539                 | -0.824<br>-2.011,0.363              | 0.102<br>-0.809,1.013                | -0.043<br>-0.930,0.844               |
|                                    |                        |                                       |                                     |                                      |                                      |
| Education. Baseline:<br>Primary    | Secondary-lower        | -2.427**<br>-3.965,-0.889             | -2.071**<br>-3.879,-0.264           | -1.954**<br>-3.238,-0.671            | -2.158**<br>-3.457,-0.860            |
|                                    | Secondary-upper        | -0.791<br>-2.168,0.587                | -0.406<br>-2.158,1.345              | -1.047**<br>-2.031,-0.063            | -0.779<br>-1.939,0.381               |
|                                    | Tertiary               | -0.670<br>-2.395,1.055                | -0.641<br>-2.819,1.537              | -0.379<br>-1.489,0.732               | -0.556<br>-1.930,0.818               |
|                                    |                        |                                       |                                     |                                      |                                      |
| Occupation#Age                     | Managers II # 25-44    | 1.588**<br>0.169,3.008                | 3.681***<br>2.116,5.247             | 0.857<br>-0.423,2.136                | 1.893**<br>0.716,3.070               |
|                                    | Managers II # 45-64    | 0.382<br>-0.867,1.631                 | 2.757***<br>1.532,3.982             | -0.026<br>-1.105,1.053               | 0.882*<br>-0.104,1.868               |
|                                    | Managers II # 65-74    | 0.627<br>-0.729,1.982                 | 3.131***<br>1.827,4.436             | -0.114<br>-1.328,1.099               | 1.040*<br>-0.043,2.123               |
|                                    | Managers II # 75-89    | 0.813<br>-0.558,2.183                 | 2.867***<br>1.540,4.193             | 0.373<br>-0.788,1.533                | 1.213**<br>0.165,2.260               |
|                                    | Managers II # >=90     | 2.802*<br>-0.300,5.903                | 2.486***<br>1.110,3.861             | 2.263*<br>-0.291,4.817               | 2.520**<br>0.524,4.515               |
|                                    | Intermediate # 25-44   | -1.867*<br>-3.918,0.184               | 0.790<br>-0.859,2.439               | -0.103<br>-2.025,1.818               | -0.501<br>-2.137,1.135               |
|                                    | Intermediate # 45-64   | -2.130**<br>-3.720,-0.539             | 0.088<br>-1.113,1.289               | -0.309<br>-2.003,1.385               | -0.863<br>-2.190,0.465               |
|                                    | Intermediate # 65-74   | -1.819**<br>-3.502,-0.137             | 0.278<br>-0.933,1.489               | 0.252<br>-1.515,2.019                | -0.494<br>-1.881,0.893               |
|                                    | Intermediate # 75-89   | -2.285**<br>-3.891,-0.680             | 0.033<br>-1.200,1.266               | 0.040<br>-1.600,1.681                | -0.807<br>-2.110,0.495               |
|                                    | Intermediate # >=90    | 1.281<br>-1.458,4.021                 | -0.103<br>-1.329,1.122              | 2.661**<br>0.092,5.231               | 1.406<br>-0.549,3.360                |
|                                    | Semi-qualified # 25-44 | -1.151<br>-2.690,0.389                | -1.069<br>-2.707,0.569              | -0.643<br>-1.941,0.655               | -0.944<br>-2.165,0.277               |
|                                    | Semi-qualified # 45-64 | -0.843<br>-2.258,0.571                | -1.464*<br>-3.019,0.091             | -0.525<br>-1.663,0.614               | -0.897<br>-2.017,0.223               |
|                                    | Semi-qualified # 65-74 | -0.695<br>-2.140,0.749                | -1.387*<br>-2.956,0.183             | -0.743<br>-1.939,0.453               | -0.901<br>-2.054,0.252               |
|                                    | Semi-qualified # 75-89 | -1.495**<br>-2.951,-0.040             | -1.657**<br>-3.211,-0.102           | -1.094*<br>-2.273,0.085              | -1.393**<br>-2.535,-0.252            |
|                                    | Semi-qualified # >=90  | -0.237<br>-3.131,2.658                | -1.461*<br>-3.199,0.277             | -0.389<br>-3.026,2.247               | -0.626<br>-2.744,1.492               |
|                                    | Non-qualified # 25-44  | -0.159<br>-1.512,1.195                | 0.900<br>-0.406,2.206               | -0.148<br>-1.350,1.053               | 0.134<br>-0.930,1.198                |
|                                    | Non-qualified # 45-64  | -0.593<br>-1.815,0.629                | 0.771<br>-0.472,2.014               | -0.333<br>-1.355,0.690               | -0.126<br>-1.081,0.828               |
|                                    | Non-qualified # 65-74  | -0.283<br>-1.537,0.970                | 0.615<br>-0.639,1.869               | -0.119<br>-1.198,0.960               | 0.021<br>-0.965,1.008                |

|                                      |                         |                 |                 |                 |                 |
|--------------------------------------|-------------------------|-----------------|-----------------|-----------------|-----------------|
|                                      | Non-qualified # 75-89   | -0.840          | 0.716           | -0.372          | -0.246          |
|                                      | Non-qualified # >=90    | -2.090,0.410    | -0.531,1.963    | -1.411,0.666    | -1.210,0.719    |
|                                      |                         | 1.234           | 1.584**         | 0.997           | 1.243           |
|                                      |                         | -1.333,3.802    | 0.185,2.984     | -1.277,3.270    | -0.582,3.068    |
| Education#Age                        | Secondary-lower # 25-44 | 2.265**         | 1.135           | 2.035**         | 1.873**         |
|                                      |                         | 0.406,4.124     | -0.970,3.240    | 0.304,3.766     | 0.278,3.469     |
|                                      | Secondary-lower # 45-64 | 2.015**         | 1.266           | 1.601**         | 1.660**         |
|                                      |                         | 0.419,3.611     | -0.574,3.107    | 0.243,2.959     | 0.315,3.005     |
|                                      | Secondary-lower # 65-74 | 2.413**         | 1.470           | 2.026**         | 2.015**         |
|                                      |                         | 0.828,3.998     | -0.358,3.299    | 0.680,3.371     | 0.680,3.350     |
|                                      | Secondary-lower # 75-89 | 2.263**         | 1.395           | 2.025**         | 1.940**         |
|                                      |                         | 0.685,3.841     | -0.423,3.214    | 0.700,3.350     | 0.617,3.263     |
|                                      | Secondary-lower # >=90  | 2.109**         | 1.658*          | 1.889**         | 1.906**         |
|                                      |                         | 0.304,3.915     | -0.284,3.599    | 0.238,3.540     | 0.409,3.403     |
|                                      | Secondary-upper # 25-44 | 0.523           | -0.375          | 0.994           | 0.449           |
|                                      |                         | -1.096,2.142    | -2.356,1.606    | -0.418,2.406    | -0.946,1.844    |
|                                      | Secondary-upper # 45-64 | 0.453           | 0.242           | 0.781           | 0.515           |
|                                      |                         | -0.976,1.883    | -1.542,2.027    | -0.280,1.842    | -0.689,1.718    |
|                                      | Secondary-upper # 65-74 | 0.742           | 0.164           | 1.031*          | 0.689           |
|                                      |                         | -0.698,2.182    | -1.613,1.940    | -0.053,2.114    | -0.520,1.898    |
|                                      | Secondary-upper # 75-89 | 0.813           | 0.215           | 1.170**         | 0.779           |
|                                      |                         | -0.650,2.275    | -1.576,2.005    | 0.088,2.251     | -0.436,1.995    |
|                                      | Secondary-upper # >=90  | 2.227*          | 0.077           | 1.729*          | 1.460*          |
|                                      |                         | -0.006,4.460    | -1.746,1.900    | -0.211,3.669    | -0.197,3.116    |
|                                      | Tertiary # 25-44        | 0.462           | 0.342           | 0.347           | 0.388           |
|                                      |                         | -1.504,2.428    | -2.040,2.724    | -1.214,1.909    | -1.220,1.995    |
|                                      | Tertiary # 45-64        | -0.080          | 0.431           | -0.061          | 0.066           |
|                                      |                         | -1.880,1.721    | -1.791,2.653    | -1.292,1.170    | -1.371,1.503    |
|                                      | Tertiary # 65-74        | 0.239           | 0.669           | 0.283           | 0.373           |
|                                      |                         | -1.629,2.107    | -1.573,2.911    | -1.045,1.612    | -1.117,1.862    |
|                                      | Tertiary # 75-89        | 0.172           | 0.670           | 0.015           | 0.251           |
|                                      |                         | -1.701,2.045    | -1.591,2.931    | -1.283,1.312    | -1.229,1.730    |
|                                      | Tertiary # >=90         | -1.374          | -0.118          | -2.277          | -1.359          |
|                                      |                         | -5.720,2.973    | -2.383,2.148    | -7.155,2.602    | -4.807,2.088    |
| HRQoL                                | EQ-5Dindex              | 0.563**         | 0.222           | 0.742**         | 0.535**         |
|                                      |                         | 0.112,1.015     | -0.067,0.511    | 0.292,1.192     | 0.186,0.884     |
| Constant term                        | Constant                | 6.412***        | 2.807**         | 7.679***        | 5.890***        |
|                                      |                         | 4.743,8.082     | 0.835,4.779     | 6.562,8.796     | 4.510,7.269     |
| Goodness-of-fit                      | R-squared               | 0.040           | 0.056           | 0.037           | 0.029           |
|                                      | BIC                     | 18,224.702      | 16,507.682      | 18,441.584      | 16,521.305      |
| Heteroscedasticity correction method | YES                     | Robust variance | Robust variance | Robust variance | Robust variance |
| Sample size                          | N                       | 3,883           | 3,883           | 3,883           | 3,883           |

\*  $p < 0.1$ , \*\*  $p < 0.05$ , \*\*\*  $p < 0.001$ ; Coef.: Regression coefficient; QoL: Quality of Life; BIC: Bayesian information criterion; the presented model is corrected from heteroscedasticity using Eicker–Huber–White standard errors. ¥: Missing responses excluded for the analyses.
