# Supplementary material for: Inequalities in Health Care Experience of Patients with Chronic Conditions: Results from a Population-Based Study
Source: MDPI journal article supplement (doi:10.3390/healthcare9081005), 2021-08-05
Supplement: s1 [file s1]

**Table S1.** Model 1 - WLS results (detailed). Differences in healthcare experience among patients with self-declared chronic conditions. The effect of sociodemographic and economic characteristics.

| Variable              | Category               | Factor 1:<br>INTER<br>Coef.<br>95% C.I. | Factor 2:<br>NEW<br>Coef.<br>95% C.I. | Factor 3:<br>SELF<br>Coef.<br>95% C.I. | OVERALL<br>IEXPAC<br>Coef.<br>95% C.I. |
|-----------------------|------------------------|-----------------------------------------|---------------------------------------|----------------------------------------|----------------------------------------|
| Gender. Baseline:     | Men                    | 0.214**                                 | 0.022                                 | 0.168**                                | 0.145**                                |
| Women                 |                        | 0.051,0.377                             | -0.106,0.150                          | 0.009,0.326                            | 0.017,0.273                            |
| Age ranges: Baseline: | 25-44                  | -1.373*                                 | -1.022                                | -1.080                                 | -1.171                                 |
| 15-24                 |                        | -2.979,0.232                            | -3.229,1.184                          | -3.012,0.852                           | -2.804,0.462                           |
|                       | 45-64                  | -0.808                                  | -1.249                                | -0.264                                 | -0.730                                 |
|                       |                        | -1.991,0.376                            | -3.258,0.760                          | -1.974,1.446                           | -2.151,0.690                           |
|                       | 65-74                  | -0.715                                  | -1.659                                | -0.338                                 | -0.835                                 |
|                       |                        | -1.921,0.491                            | -3.663,0.345                          | -2.050,1.375                           | -2.261,0.590                           |
|                       | 75-89                  | -0.097                                  | -1.848*                               | 0.403                                  | -0.393                                 |
|                       |                        | -1.249,1.054                            | -3.840,0.144                          | -1.296,2.102                           | -1.793,1.007                           |
|                       | >=90                   | -1.121                                  | -2.464**                              | -1.186                                 | -1.511                                 |
|                       |                        | -3.518,1.275                            | -4.541, -0.387                        | -4.092,1.720                           | -3.661,0.639                           |
| Occupation            | Managers II            | -0.355                                  | -2.631***                             | -0.693                                 | -1.098**                               |
| Baseline: Managers I  |                        | -1.240,0.531                            | -3.733, -1.529                        | -1.788,0.403                           | -1.954, -0.243                         |
|                       | Intermediate           | -0.660                                  | -0.169                                | 1.561**                                | 0.282                                  |
|                       |                        | -2.127,0.807                            | -1.230,0.892                          | 0.150,2.972                            | -0.890,1.453                           |
|                       | Semi-qualified         | 0.616                                   | 1.452*                                | 0.974                                  | 0.974*                                 |
|                       |                        | -0.420,1.651                            | -0.053,2.956                          | -0.368,2.317                           | -0.088,2.037                           |
|                       | Non-qualified          | 0.094                                   | -0.826                                | 0.393                                  | -0.048                                 |
|                       |                        | -0.829,1.018                            | -2.015,0.362                          | -0.757,1.543                           | -0.944,0.848                           |
| Education. Baseline:  | Secondary-lower        | -1.951**                                | -2.070**                              | -2.425**                               | -2.156**                               |
| Primary               |                        | -3.247, -0.656                          | -3.879, -0.262                        | -3.971, -0.879                         | -3.462, -0.850                         |
|                       | Secondary-upper        | -1.041**                                | -0.404                                | -0.786                                 | -0.775                                 |
|                       |                        | -2.043, -0.038                          | -2.157,1.348                          | -2.168,0.596                           | -1.942,0.393                           |
|                       | Tertiary               | -0.361                                  | -0.636                                | -0.656                                 | -0.544                                 |
|                       |                        | -1.493,0.771                            | -2.814,1.543                          | -2.392,1.079                           | -1.927,0.840                           |
| Occupation#Age        | Managers II # 25-44    | 0.849                                   | 3.679***                              | 1.582**                                | 1.887**                                |
|                       |                        | -0.443,2.140                            | 2.112,5.246                           | 0.153,3.012                            | 0.701,3.074                            |
|                       | Managers II # 45-64    | -0.027                                  | 2.757***                              | 0.381                                  | 0.880*                                 |
|                       |                        | -1.115,1.060                            | 1.529,3.984                           | -0.877,1.638                           | -0.114,1.874                           |
|                       | Managers II # 65-74    | -0.133                                  | 3.126***                              | 0.612                                  | 1.027*                                 |
|                       |                        | -1.357,1.091                            | 1.819,4.432                           | -0.753,1.977                           | -0.065,2.118                           |
|                       | Managers II # 75-89    | 0.349                                   | 2.859***                              | 0.794                                  | 1.195**                                |
|                       |                        | -0.818,1.515                            | 1.531,4.188                           | -0.584,2.173                           | 0.141,2.250                            |
|                       | Managers II # >=90     | 2.159*                                  | 2.454***                              | 2.723*                                 | 2.444**                                |
|                       |                        | -0.378,4.696                            | 1.055,3.854                           | -0.324,5.769                           | 0.473,4.416                            |
|                       | Intermediate # 25-44   | -0.135                                  | 0.781                                 | -1.891*                                | -0.524                                 |
|                       |                        | -2.071,1.802                            | -0.872,2.434                          | -3.956,0.174                           | -2.173,1.126                           |
|                       | Intermediate # 45-64   | -0.311                                  | 0.088                                 | -2.131**                               | -0.864                                 |
|                       |                        | -1.998,1.377                            | -1.114,1.289                          | -3.722, -0.540                         | -2.190,0.462                           |
|                       | Intermediate # 65-74   | 0.255                                   | 0.279                                 | -1.817**                               | -0.492                                 |
|                       |                        | -1.503,2.014                            | -0.931,1.489                          | -3.498, -0.136                         | -1.875,0.891                           |
|                       | Intermediate # 75-89   | 0.059                                   | 0.038                                 | -2.271**                               | -0.794                                 |
|                       |                        | -1.570,1.688                            | -1.193,1.270                          | -3.874, -0.668                         | -2.091,0.503                           |
|                       | Intermediate # >=90    | 2.659**                                 | -0.104                                | 1.279                                  | 1.404                                  |
|                       |                        | 0.010,5.308                             | -1.344,1.136                          | -1.583,4.141                           | -0.643,3.450                           |
|                       | Semi-qualified # 25-44 | -0.620                                  | -1.062                                | -1.134                                 | -0.927                                 |
|                       |                        | -1.925,0.684                            | -2.702,0.577                          | -2.683,0.416                           | -2.157,0.302                           |
|                       | Semi-qualified # 45-64 | -0.500                                  | -1.457*                               | -0.825                                 | -0.879                                 |
|                       |                        | -1.643,0.643                            | -3.013,0.100                          | -2.249,0.600                           | -2.006,0.248                           |
|                       | Semi-qualified # 65-74 | -0.703                                  | -1.375*                               | -0.665                                 | -0.873                                 |
|                       |                        | -1.901,0.495                            | -2.945,0.196                          | -2.119,0.788                           | -2.031,0.286                           |

|                                      |                         |                 |                 |                 |                 |
|--------------------------------------|-------------------------|-----------------|-----------------|-----------------|-----------------|
|                                      | Semi-qualified # 75-89  | -1.049*         | -1.643**        | -1.461*         | -1.361**        |
|                                      |                         | -2.229,0.131    | -3.199,-0.088   | -2.925,0.003    | -2.508,-0.214   |
|                                      | Semi-qualified# >=90    | -0.346          | -1.448          | -0.204          | -0.595          |
|                                      |                         | -3.027,2.334    | -3.191,0.294    | -3.145,2.736    | -2.752,1.562    |
|                                      | Non-qualified # 25-44   | -0.136          | 0.903           | -0.150          | 0.142           |
|                                      |                         | -1.351,1.079    | -0.404,2.211    | -1.513,1.213    | -0.931,1.216    |
|                                      | Non-qualified # 45-64   | -0.327          | 0.772           | -0.589          | -0.123          |
|                                      |                         | -1.362,0.707    | -0.472,2.017    | -1.821,0.642    | -1.087,0.841    |
|                                      | Non-qualified # 65-74   | -0.105          | 0.619           | -0.273          | 0.032           |
|                                      |                         | -1.194,0.984    | -0.636,1.875    | -1.535,0.990    | -0.963,1.026    |
|                                      | Non-qualified # 75-89   | -0.354          | 0.721           | -0.826          | -0.233          |
|                                      |                         | -1.401,0.692    | -0.527,1.970    | -2.084,0.432    | -1.205,0.740    |
|                                      | Non-qualified # >=90    | 1.061           | 1.604**         | 1.283           | 1.290           |
|                                      |                         | -1.293,3.415    | 0.197,3.010     | -1.348,3.914    | -0.597,3.176    |
| Education#Age                        | Secondary-lower # 25-44 | 2.070**         | 1.146           | 2.292**         | 1.899**         |
|                                      |                         | 0.320,3.821     | -0.961,3.252    | 0.422,4.162     | 0.291,3.506     |
|                                      | Secondary-lower # 45-64 | 1.584**         | 1.261           | 2.002**         | 1.648**         |
|                                      |                         | 0.214,2.954     | -0.581,3.104    | 0.399,3.606     | 0.295,3.001     |
|                                      | Secondary-lower # 65-74 | 1.984**         | 1.458           | 2.381**         | 1.985**         |
|                                      |                         | 0.628,3.340     | -0.372,3.287    | 0.789,3.973     | 0.643,3.327     |
|                                      | Secondary-lower # 75-89 | 1.994**         | 1.386           | 2.239**         | 1.918**         |
|                                      |                         | 0.658,3.331     | -0.433,3.206    | 0.654,3.825     | 0.587,3.248     |
|                                      | Secondary-lower # >=90  | 1.822**         | 1.638*          | 2.058**         | 1.858**         |
|                                      |                         | 0.162,3.483     | -0.302,3.577    | 0.248,3.869     | 0.357,3.359     |
|                                      | Secondary-upper # 25-44 | 1.037           | -0.362          | 0.555           | 0.480           |
|                                      |                         | -0.403,2.477    | -2.346,1.621    | -1.074,2.185    | -0.929,1.890    |
|                                      | Secondary-upper # 45-64 | 0.788           | 0.245           | 0.459           | 0.520           |
|                                      |                         | -0.291,1.867    | -1.541,2.030    | -0.976,1.893    | -0.691,1.731    |
|                                      | Secondary-upper # 65-74 | 1.011*          | 0.158           | 0.727           | 0.675           |
|                                      |                         | -0.089,2.111    | -1.619,1.935    | -0.717,2.172    | -0.541,1.892    |
|                                      | Secondary-upper # 75-89 | 1.175**         | 0.216           | 0.817           | 0.784           |
|                                      |                         | 0.078,2.273     | -1.575,2.008    | -0.650,2.285    | -0.439,2.006    |
|                                      | Secondary-upper # >=90  | 1.796*          | 0.097           | 2.278**         | 1.508*          |
|                                      |                         | -0.151,3.744    | -1.730,1.924    | 0.045,4.511     | -0.154,3.170    |
|                                      | Tertiary # 25-44        | 0.398           | 0.358           | 0.501           | 0.424           |
|                                      |                         | -1.194,1.990    | -2.025,2.741    | -1.481,2.482    | -1.199,2.047    |
|                                      | Tertiary # 45-64        | -0.048          | 0.434           | -0.070          | 0.075           |
|                                      |                         | -1.299,1.203    | -1.788,2.657    | -1.881,1.741    | -1.371,1.522    |
|                                      | Tertiary # 65-74        | 0.280           | 0.668           | 0.236           | 0.370           |
|                                      |                         | -1.068,1.628    | -1.574,2.910    | -1.642,2.115    | -1.129,1.869    |
|                                      | Tertiary # 75-89        | 0.044           | 0.679           | 0.194           | 0.272           |
|                                      |                         | -1.270,1.358    | -1.582,2.940    | -1.688,2.076    | -1.216,1.759    |
|                                      | Tertiary # >=90         | -2.282          | -0.119          | -1.378          | -1.363          |
|                                      |                         | -7.276,2.712    | -2.397,2.159    | -5.781,3.026    | -4.884,2.158    |
| Constant term                        |                         | 8.369***        | 3.013**         | 6.936***        | 6.387***        |
|                                      |                         | 7.316,9.422     | 1.052,4.974     | 5.305,8.567     | 5.031,7.744     |
| Goodness-of-fit                      | R-squared               | 0.034           | 0.055           | 0.039           | 0.027           |
|                                      | BIC                     | 18,445.536      | 16,501.215      | 18,223.872      | 16,523.464      |
| Heteroscedasticity correction method | YES                     | Robust variance | Robust variance | Robust variance | Robust variance |
| Sample size (¥)                      | N                       | 3,883           | 3,883           | 3,883           | 3,883           |

\*  $p < 0.1$ , \*\*  $p < 0.05$ , \*\*\*  $p < 0.001$ ; Coef.: Regression coefficient; BIC: Bayesian information criterion; the presented model is corrected from heteroscedasticity using Eicker–Huber–White standard errors. ¥: Missing responses excluded for the analyses.
