# Supplementary material for: Inequalities in Health Care Experience of Patients with Chronic Conditions: Results from a Population-Based Study
Source: MDPI journal article supplement (doi:10.3390/healthcare9081005), 2021-08-05
Supplement: s1 [file s1]

**Table S2.** Model 2—WLS results (detailed). Differences in healthcare experience among patients with self-declared chronic conditions. The effect of the presence of multi-morbidity.

| Variable                           | Category               | Factor 1:<br>INTER<br>Coef.<br>95% CI | Factor 2:<br>NEW<br>Coef.<br>95% CI | Factor 3:<br>SELF<br>Coef.<br>95% CI | OVERALL<br>IEXPAC<br>Coef.<br>95% CI |
|------------------------------------|------------------------|---------------------------------------|-------------------------------------|--------------------------------------|--------------------------------------|
| Gender                             | Men                    | 0.210**<br>0.047,0.374                | 0.013<br>-0.116,0.142               | 0.160**<br>0.001,0.319               | 0.138**<br>0.010,0.266               |
| Age ranges. Baseline:<br>15-24     | 25-44                  | -1.493*<br>-3.106,0.121               | -1.087<br>-3.310,1.135              | -1.111<br>-3.080,0.858               | -1.243<br>-2.909,0.423               |
|                                    | 45-64                  | -0.890<br>-2.072,0.292                | -1.201<br>-3.227,0.826              | -0.305<br>-2.051,1.442               | -0.762<br>-2.218,0.694               |
|                                    | 65-74                  | -1.059*<br>-2.297,0.178               | -1.627<br>-3.656,0.401              | -0.608<br>-2.382,1.166               | -1.050<br>-2.530,0.430               |
|                                    | 75-89                  | -0.020<br>-1.189,1.150                | -1.648<br>-3.666,0.371              | 0.548<br>-1.206,2.302                | -0.257<br>-1.705,1.190               |
|                                    | >=90                   | -2.066<br>-4.685,0.553                | -3.026**<br>-5.195,-0.857           | -2.399<br>-5.600,0.802               | -2.449**<br>-4.760,-0.138            |
| Education. Baseline:<br>Primary    | Secondary-lower        | -2.165**<br>-3.458,-0.873             | -2.225**<br>-4.065,-0.385           | -2.491**<br>-4.081,-0.901            | -2.300***<br>-3.651,-0.949           |
|                                    | Secondary-upper        | -1.169**<br>-2.169,-0.169             | -0.446<br>-2.189,1.297              | -0.826<br>-2.246,0.595               | -0.847<br>-2.050,0.356               |
|                                    | Tertiary               | -0.252<br>-1.459,0.955                | -0.925<br>-2.923,1.072              | -0.703<br>-2.510,1.104               | -0.600<br>-1.995,0.795               |
|                                    |                        |                                       |                                     |                                      |                                      |
| Occupation<br>Baseline: Managers I | Managers II            | -0.360<br>-1.242,0.521                | -2.656***<br>-3.748,-1.564          | -0.684<br>-1.792,0.424               | -1.104**<br>-1.964,-0.245            |
|                                    | Intermediate           | -0.577<br>-2.023,0.869                | -0.188<br>-1.213,0.837              | 1.583**<br>0.168,2.999               | 0.315<br>-0.846,1.475                |
|                                    | Semi-qualified         | 0.676<br>-0.391,1.743                 | 1.398*<br>-0.154,2.950              | 0.961<br>-0.420,2.342                | 0.977*<br>-0.119,2.072               |
|                                    | Non-qualified          | 0.303<br>-0.642,1.249                 | -0.686<br>-1.854,0.481              | 0.451<br>-0.732,1.635                | 0.087<br>-0.824,0.999                |
|                                    |                        |                                       |                                     |                                      |                                      |
| Occupation#Age                     | Managers II # 25-44    | 0.932<br>-0.352,2.215                 | 3.836***<br>2.281,5.392             | 1.668**<br>0.234,3.103               | 1.992***<br>0.807,3.176              |
|                                    | Managers II # 45-64    | -0.018<br>-1.101,1.065                | 2.794***<br>1.576,4.012             | 0.370<br>-0.898,1.638                | 0.890*<br>-0.106,1.887               |
|                                    | Managers II # 65-74    | -0.152<br>-1.378,1.074                | 3.148***<br>1.852,4.445             | 0.587<br>-0.793,1.967                | 1.017*<br>-0.081,2.115               |
|                                    | Managers II # 75-89    | 0.353<br>-0.813,1.520                 | 2.829***<br>1.498,4.160             | 0.763<br>-0.629,2.156                | 1.177**<br>0.116,2.239               |
|                                    | Managers II # >=90     | -0.512,4.974<br>2.231                 | 1.126,3.951<br>2.538***             | -0.204,5.759<br>2.778*               | 0.502,4.525<br>2.514**               |
|                                    | Intermediate # 25-44   | -0.148<br>-2.068,1.773                | 0.809<br>-0.837,2.455               | -1.845*<br>-3.921,0.231              | -0.504<br>-2.152,1.145               |
|                                    | Intermediate # 45-64   | -0.395<br>-2.063,1.273                | 0.117<br>-1.052,1.285               | -2.161**<br>-3.755,-0.567            | -0.898<br>-2.213,0.418               |
|                                    | Intermediate # 65-74   | 0.193<br>-1.550,1.937                 | 0.272<br>-0.908,1.452               | -1.819**<br>-3.508,-0.129            | -0.517<br>-1.893,0.860               |
|                                    | Intermediate # 75-89   | -0.060<br>-1.669,1.549                | 0.024<br>-1.172,1.219               | -2.327**<br>-3.934,-0.720            | -0.861<br>-2.148,0.425               |
|                                    | Intermediate # >=90    | 2.540*<br>-0.053,5.132                | -0.125<br>-1.358,1.108              | 1.225<br>-1.633,4.083                | 1.335<br>-0.669,3.339                |
|                                    | Semi-qualified # 25-44 | -0.581<br>-1.916,0.753                | -0.952<br>-2.630,0.727              | -1.005<br>-2.588,0.579               | -0.836<br>-2.095,0.422               |
|                                    | Semi-qualified # 45-64 | -0.558<br>-1.730,0.614                | -1.395*<br>-2.997,0.208             | -0.813<br>-2.274,0.648               | -0.879<br>-2.038,0.280               |
|                                    | Semi-qualified # 65-74 | -0.751<br>-1.976,0.474                | -1.335<br>-2.952,0.282              | -0.643<br>-2.131,0.845               | -0.871<br>-2.060,0.318               |
|                                    | Semi-qualified # 75-89 | -1.118*<br>-2.326,0.090               | -1.591*<br>-3.192,0.009             | -1.461*<br>-2.960,0.038              | -1.372**<br>-2.550,-0.194            |

|                                     |                         |              |               |              |               |
|-------------------------------------|-------------------------|--------------|---------------|--------------|---------------|
|                                     | Semi-qualified # >=90   | -0.223       | -1.306        | 0.043        | -0.422        |
|                                     |                         | -2.927,2.481 | -3.114,0.501  | -2.918,3.003 | -2.593,1.749  |
|                                     | Non-qualified # 25-44   | -0.280       | 0.819         | -0.131       | 0.074         |
|                                     |                         | -1.518,0.959 | -0.468,2.105  | -1.525,1.264 | -1.015,1.163  |
|                                     | Non-qualified # 45-64   | -0.528       | 0.646         | -0.647       | -0.251        |
|                                     |                         | -1.583,0.526 | -0.580,1.871  | -1.910,0.617 | -1.230,0.727  |
|                                     | Non-qualified # 65-74   | -0.323       | 0.473         | -0.341       | -0.112        |
|                                     |                         | -1.430,0.785 | -0.762,1.709  | -1.633,0.952 | -1.121,0.896  |
|                                     | Non-qualified # 75-89   | -0.573       | 0.563         | -0.908       | -0.385        |
|                                     |                         | -1.640,0.493 | -0.664,1.790  | -2.197,0.381 | -1.371,0.600  |
|                                     | Non-qualified # >=90    | 1.077        | 1.556**       | 1.514        | 1.367         |
|                                     |                         | -1.302,3.457 | 0.154,2.959   | -1.146,4.174 | -0.530,3.264  |
| Education#Age                       | Secondary-lower # 25-44 | 2.297**      | 1.220         | 2.331**      | 2.016**       |
|                                     |                         | 0.538,4.057  | -0.919,3.359  | 0.419,4.243  | 0.369,3.663   |
|                                     | Secondary-lower # 45-64 | 1.855**      | 1.478         | 2.107**      | 1.844**       |
|                                     |                         | 0.485,3.224  | -0.396,3.352  | 0.459,3.755  | 0.446,3.241   |
|                                     | Secondary-lower # 65-74 | 2.054**      | 1.660*        | 2.322**      | 2.044**       |
|                                     |                         | 0.698,3.410  | -0.200,3.521  | 0.685,3.959  | 0.658,3.431   |
|                                     | Secondary-lower # 75-89 | 2.182**      | 1.667*        | 2.323**      | 2.093**       |
|                                     |                         | 0.842,3.521  | -0.184,3.518  | 0.689,3.957  | 0.715,3.470   |
|                                     | Secondary-lower # >=90  | 1.814**      | 1.758*        | 1.911**      | 1.834**       |
|                                     |                         | 0.146,3.482  | -0.238,3.754  | 0.058,3.764  | 0.281,3.387   |
|                                     | Secondary-upper # 25-44 | 1.174        | -0.332        | 0.612        | 0.559         |
|                                     |                         | -0.267,2.615 | -2.306,1.642  | -1.049,2.273 | -0.878,1.995  |
|                                     | Secondary-upper # 45-64 | 0.926*       | 0.292         | 0.509        | 0.601         |
|                                     |                         | -0.151,2.003 | -1.485,2.069  | -0.964,1.981 | -0.644,1.847  |
|                                     | Secondary-upper # 65-74 | 1.109**      | 0.206         | 0.738        | 0.728         |
|                                     |                         | 0.013,2.205  | -1.562,1.974  | -0.742,2.219 | -0.522,1.978  |
|                                     | Secondary-upper # 75-89 | 1.309**      | 0.307         | 0.877        | 0.879         |
|                                     |                         | 0.214,2.404  | -1.474,2.088  | -0.627,2.380 | -0.378,2.135  |
|                                     | Secondary-upper # >=90  | 1.589        | 0.017         | 1.976*       | 1.301         |
|                                     |                         | -0.331,3.509 | -1.855,1.889  | -0.258,4.210 | -0.365,2.966  |
|                                     | Tertiary # 25-44        | 0.251        | 0.584         | 0.507        | 0.435         |
|                                     |                         | -1.401,1.903 | -1.636,2.804  | -1.537,2.552 | -1.199,2.068  |
|                                     | Tertiary # 45-64        | -0.164       | 0.703         | -0.019       | 0.125         |
|                                     |                         | -1.485,1.156 | -1.343,2.748  | -1.899,1.861 | -1.334,1.583  |
|                                     | Tertiary # 65-74        | 0.156        | 0.950         | 0.272        | 0.415         |
|                                     |                         | -1.257,1.569 | -1.117,3.016  | -1.674,2.217 | -1.097,1.926  |
|                                     | Tertiary # 75-89        | -0.071       | 0.950         | 0.218        | 0.312         |
|                                     |                         | -1.458,1.315 | -1.140,3.039  | -1.733,2.169 | -1.190,1.815  |
|                                     | Tertiary # >=90         | -1.987       | 0.226         | -1.042       | -1.040        |
|                                     |                         | -7.413,3.439 | -1.966,2.418  | -5.755,3.671 | -4.867,2.787  |
| Number of conditions<br>Baseline: 1 | 2                       | -0.636       | 0.286         | -0.068       | -0.178        |
|                                     |                         | -1.569,0.298 | -0.961,1.533  | -1.055,0.919 | -0.930,0.574  |
|                                     | 3                       | -1.528*      | -1.870***     | -0.520       | -1.255**      |
|                                     |                         | -3.266,0.209 | -2.743,-0.997 | -1.703,0.662 | -2.240,-0.269 |
|                                     | +3                      | 0.341        | 0.307         | 0.322        | 0.325         |
|                                     |                         | -0.803,1.485 | -0.969,1.584  | -0.985,1.629 | -0.303,0.953  |
| Age#Number<br>of diseases           | 25-44 # 2               | 0.506        | -0.652        | -0.105       | -0.032        |
|                                     |                         | -0.597,1.608 | -1.982,0.679  | -1.223,1.012 | -0.903,0.839  |
|                                     | 25-44 # 3               | 1.472        | 2.258***      | 0.441        | 1.312**       |
|                                     |                         | -0.508,3.452 | 0.992,3.523   | -1.059,1.942 | 0.054,2.569   |
|                                     | 25-44 # +3              | -0.840       | -0.185        | -0.697       | -0.609        |
|                                     |                         | -2.316,0.636 | -1.612,1.241  | -2.250,0.857 | -1.558,0.339  |
|                                     | 45-64 # 2               | 0.522        | -0.514        | 0.053        | 0.069         |
|                                     |                         | -0.474,1.518 | -1.792,0.763  | -0.987,1.094 | -0.731,0.869  |
|                                     | 45-64 # 3               | 1.634*       | 1.727***      | 0.782        | 1.349**       |
|                                     |                         | -0.155,3.423 | 0.769,2.685   | -0.471,2.034 | 0.305,2.393   |
|                                     | 45-64 # +3              | -0.693       | -0.740        | -0.523       | -0.644*       |
|                                     |                         | -1.900,0.514 | -2.053,0.572  | -1.879,0.832 | -1.339,0.051  |
|                                     | 65-74 # 2               | 0.884*       | -0.312        | 0.414        | 0.387         |
|                                     |                         | -0.165,1.933 | -1.599,0.975  | -0.673,1.502 | -0.452,1.226  |

|                                      |            |                 |                 |                 |                 |
|--------------------------------------|------------|-----------------|-----------------|-----------------|-----------------|
|                                      | 65-74 # 3  | 1.686*          | 1.601***        | 0.672           | 1.294**         |
|                                      |            | -0.121,3.493    | 0.668,2.534     | -0.601,1.944    | 0.239,2.349     |
|                                      | 65-74 # +3 | 0.310           | -0.515          | 0.311           | 0.085           |
|                                      |            | -0.905,1.526    | -1.829,0.799    | -1.057,1.678    | -0.618,0.789    |
|                                      | 75-89 # 2  | 0.391           | -0.360          | 0.057           | 0.065           |
|                                      |            | -0.649,1.432    | -1.659,0.939    | -1.039,1.153    | -0.773,0.902    |
|                                      | 75-89 # 3  | 1.125           | 1.517**         | 0.102           | 0.860           |
|                                      |            | -0.680,2.931    | 0.576,2.458     | -1.185,1.390    | -0.199,1.920    |
|                                      | 75-89 # +3 | -0.508          | -0.839          | -0.536          | -0.608*         |
|                                      |            | -1.716,0.701    | -2.148,0.471    | -1.909,0.837    | -1.308,0.092    |
|                                      | >=90 # 2   | 0.873           | 0.036           | 0.772           | 0.608           |
|                                      |            | -1.300,3.047    | -1.453,1.525    | -1.425,2.969    | -0.995,2.212    |
|                                      | >=90 # 3   | 2.209*          | 2.554***        | 1.673           | 2.108**         |
|                                      |            | -0.277,4.695    | 1.259,3.849     | -0.618,3.964    | 0.433,3.783     |
|                                      | >=90 # +3  | 0.820           | 0.239           | 1.167           | 0.788           |
|                                      |            | -0.846,2.486    | -1.239,1.717    | -0.735,3.068    | -0.322,1.898    |
| Constant term                        |            | 8.506***        | 3.089**         | 6.975***        | 6.472***        |
|                                      |            | 7.465,9.547     | 1.114,5.064     | 5.312,8.638     | 5.083,7.861     |
| Goodness-of-fit                      | R-squared  | 0.039           | 0.063           | 0.044           | 0.033           |
|                                      | BIC        | 18,549.184      | 16,589.597      | 18,324.712      | 16,624.089      |
| Heteroscedasticity correction method | YES        | Robust variance | Robust variance | Robust variance | Robust variance |
| Sample size (¥)                      | N          | 3,878           | 3,878           | 3,878           | 3,878           |

\*  $p < 0.1$ , \*\*  $p < 0.05$ , \*\*\*  $p < 0.001$ ; Coef.: Regression coefficient; BIC: Bayesian information criterion; the presented model is corrected from heteroscedasticity using Eicker–Huber–White standard errors. ¥: Missing responses excluded for the analyses.
