# Supplementary material for: Inequalities in Health Care Experience of Patients with Chronic Conditions: Results from a Population-Based Study
Source: Healthcare (Basel). 2021 Aug 5;9(8):1005. doi: 10.3390/healthcare9081005 (PMC8394123; doi:10.3390/healthcare9081005)
Supplement: Supplementary file 1 [file healthcare-09-01005-s001.zip]

Archive with 4 entries (4 files):
- model 1_supplementary material.pdf
- model 2_supplementary material.pdf
- model 3_supplementary material.pdf
- model 4_supplementary_material.pdf
